# Supplementary material
Source: Springer Nature journal article supplement (https://www.springermedizin.de/resource/supplementary/12889_2013_6139_MOESM3_ESM.docx/9499138)
Supplement: MOESM3 [file 9499138]

**Table 2 Relationship between caries experience (DMFT) and variables selected (N = 600)**

| Factor | DMFT>0 (n, %) | Odds Ratio | | 95% C.I. | | p-value | |
| --- | --- | --- | --- | --- | --- | --- | --- |
| Frequency of soft drinks |  |  | |  | |  | |
| At least once every 2 days | 34, 28% | 1.952 | 1.193 - 3.194 | | 0.030 | |
| Less than once every 2 days # | 90, 19% |  |  | |  | |
| Frequency of Vitamin C supplement drinks | |  |  | |  | |
| At least once every 2 days | 29, 35% | 2.157 | 1.301 - 3.172 | | 0.003 | |
| Less than once every 2 days # | 95, 18% |  |  | |  | |
| Gender |  |  |  | |  | |
| Girls | 73, 26% | 1.751 | 1.141 - 2.687 | | 0.010 | |
| Boys # | 51, 16% |  |  | |  | |
| (Constant) |  | 0.149 |  | | <0.001 | |

# Reference group
